# Supplementary material for: RAIN: machine learning-based identification for HIV-1 bNAbs
Source: PubMed Central journal article supplement (PMC11196741; doi:10.1038/s41467-024-49676-1), 2024-06-24
Supplement: 41467_2024_49676_MOESM1_ESM.pdf [file 41467_2024_49676_MOESM1_ESM.pdf]

## **RAIN: Machine Learning-based identification for HIV-1 bNAbs**

Mathilde Foglierini<sup>1,2,3,\*</sup>, Pauline Nortier<sup>1,2,\*</sup>, Rachel Schelling<sup>1,2</sup>, Rahel R. Winiger<sup>1,2</sup>, Philippe Jacquet<sup>4</sup>, Sijy O'Dell<sup>5</sup>, Davide Demurtas<sup>6</sup>, Maxmillian Mpina<sup>7</sup>, Omar Lweno<sup>7</sup>, Yannick D. Muller<sup>1,2</sup>, Constantinos Petrovass<sup>8</sup>, Claudia Daubenberger<sup>9,10</sup>, Mathieu Perreau<sup>1</sup>, Nicole A Doria-Rose<sup>5</sup>, Raphael Gottardo<sup>3</sup> and Laurent Perez<sup>1,2,#</sup>

<sup>1</sup>Department of Medicine, Service of Immunology and Allergy, Lausanne University Hospital and University of Lausanne, Lausanne, Switzerland.

<sup>2</sup>Centre for Human Immunology Lausanne, Switzerland.

<sup>3</sup>Biomedical Data Science Centre, Lausanne University Hospital and University of Lausanne, Lausanne, Switzerland.

<sup>4</sup>Scientific Computing and Research Support Unit, University of Lausanne, Lausanne, Switzerland.

<sup>5</sup>Vaccine Research Center, National Institute of Allergy and Infectious Diseases, National Institutes of Health, Bethesda, MD, USA.

<sup>6</sup>Interdisciplinary center of electron microscopy, CIME, Ecole Polytechnique Fédérale de Lausanne, Lausanne, Switzerland.

<sup>7</sup>Ifakara Health Institute, Bagamoyo, United Republic of Tanzania.

<sup>8</sup>Department of Laboratory Medicine and Pathology, Institute of Pathology, Lausanne University Hospital, Lausanne, Switzerland

<sup>9</sup>Department of Medical Parasitology and Infection Biology, Clinical Immunology Unit, Swiss Tropical and Public Health Institute, Basel, Switzerland.

<sup>10</sup>University of Basel, Basel, Switzerland.

\*These authors contributed equally

#Corresponding author: Laurent Perez

**email:** [laurent.perez@chuv.ch](mailto:laurent.perez@chuv.ch)

## **Supplementary Information**

Supplementary Figures 1-10

Supplementary Tables 1-3

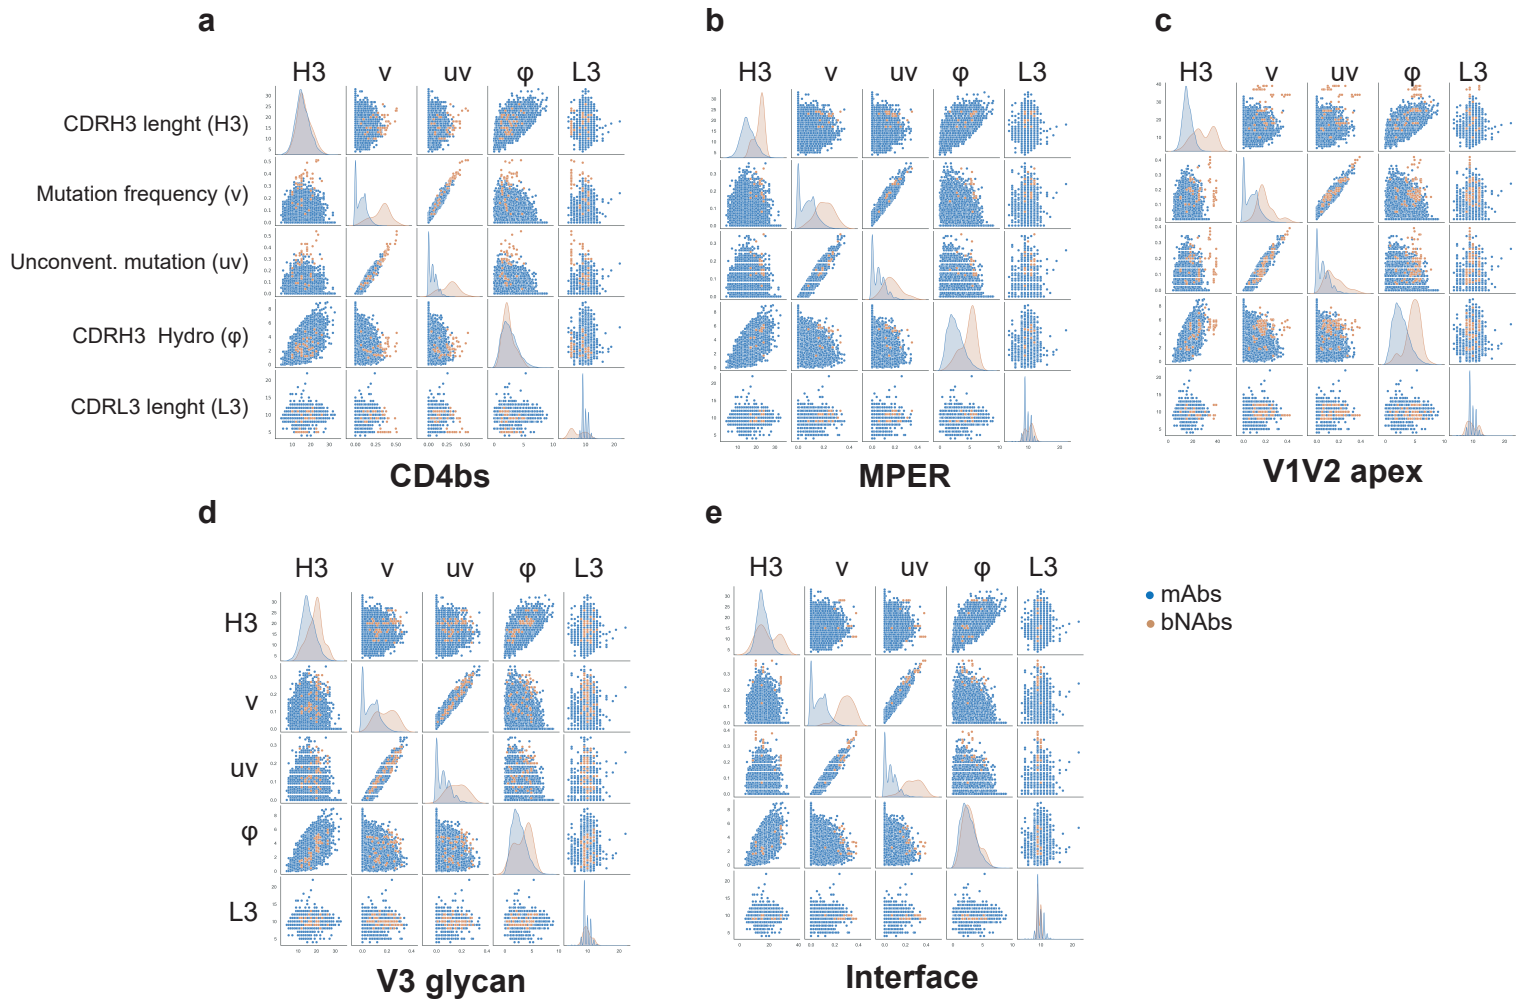

**Supplementary Figure. 1. Correlation of each feature pair in the dataset against the class distribution.** Pairwise relationships between the specific features comparing mAbs (blue) and bNAbs (red). Each bNAb category is represented by a single plot per antigenic site: **(a)** CD4bs, **(b)** MPER, **(c)** V1V2 apex, **(d)** V3 glycan, and **(e)** gp120/gp41 interface. Source data are provided as a Source Data file.

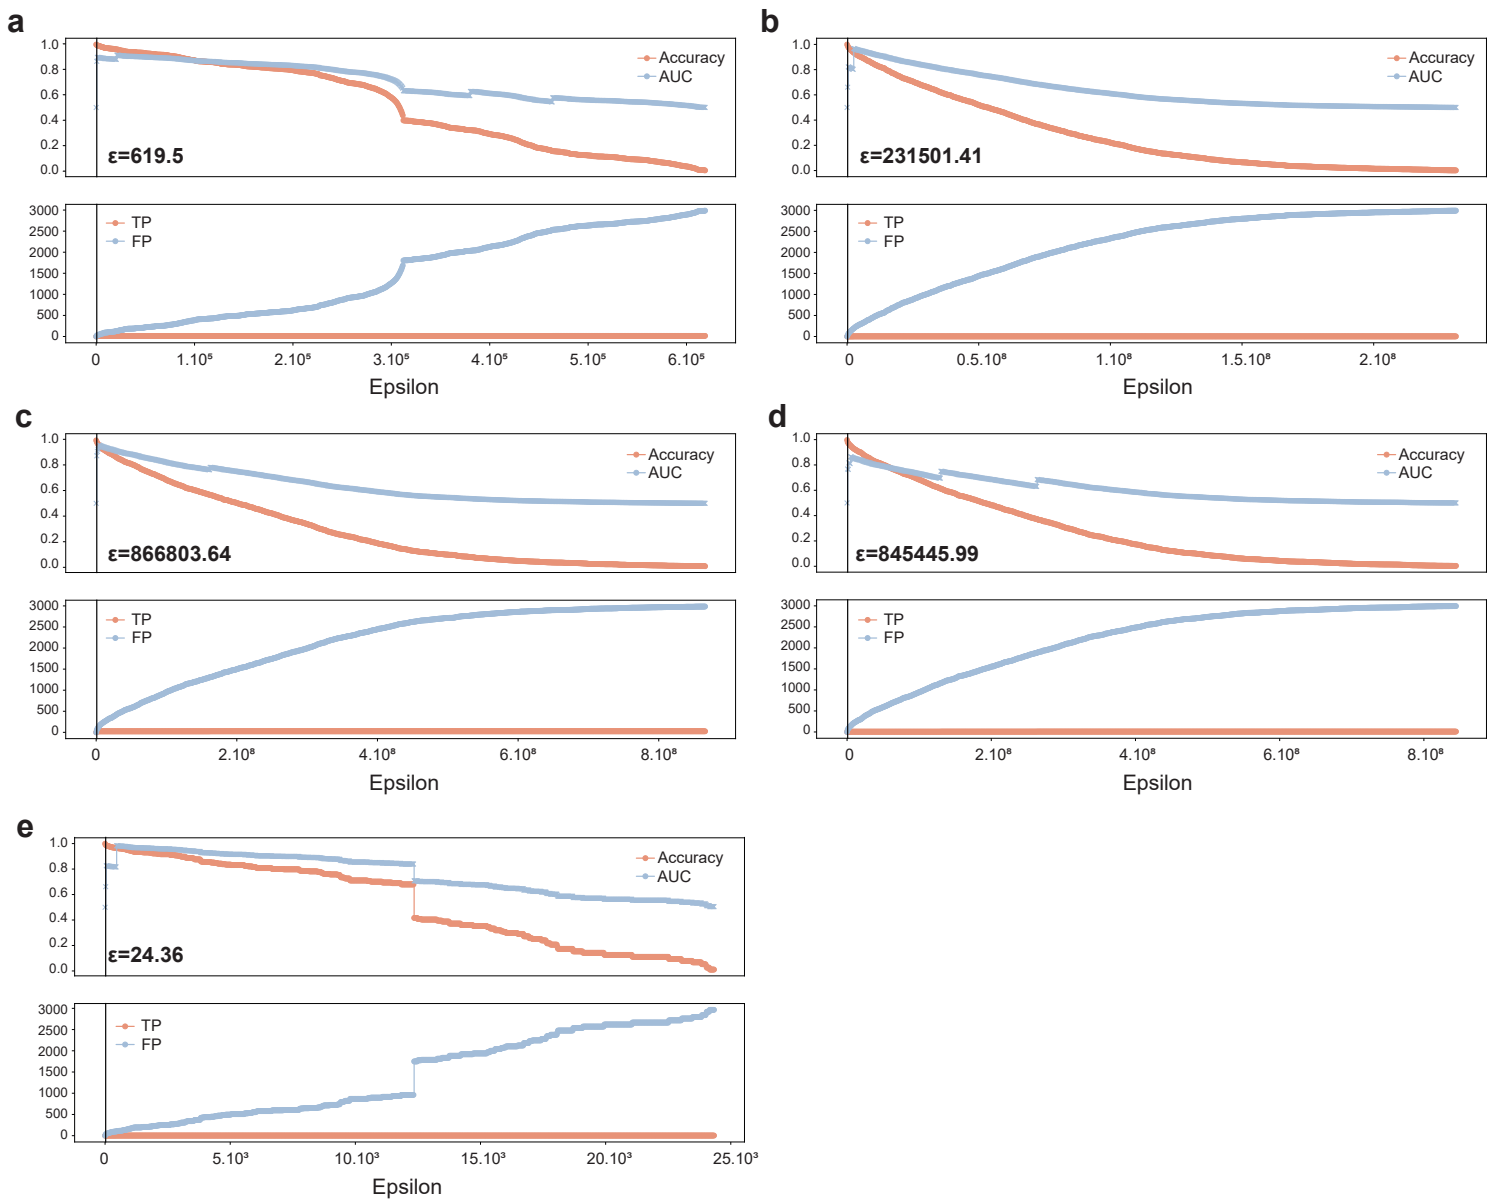

**Supplementary Figure 2. Determination of the epsilon parameter for the Anomaly detection algorithm.** Epsilon parameters for the antigenic site (a) CD4bs, (b) MPER, (c) V1V2 apex, (d) V3 glycan, and (e) gp120/gp41 interface. The accuracy is in red and the area under the curve (AUC) is in blue.

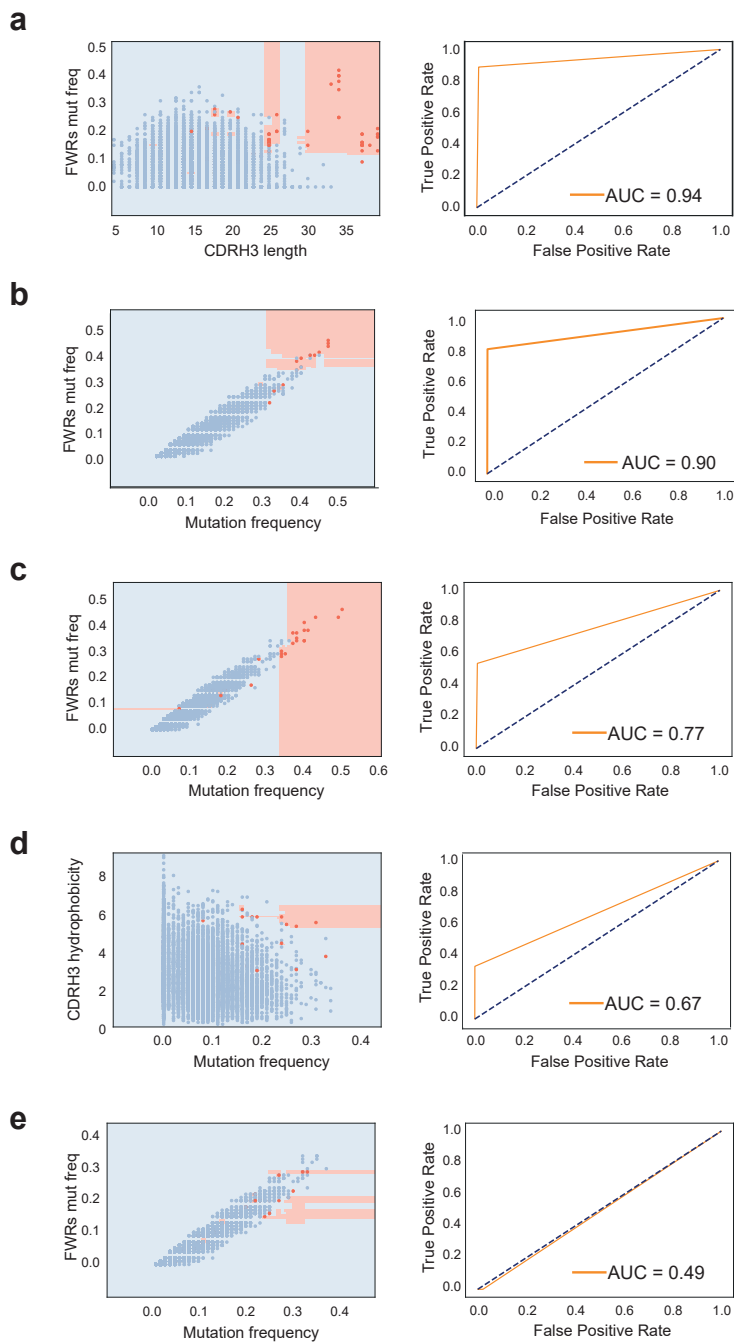

**Supplementary Figure 3. Random Forest classifier with only two features.** Left panels are the decision regions obtained from the training dataset and right panels are the receiver-operating characteristic (ROC) curves in orange with the corresponding area under the curve (AUC). The dashed blue line is for visual reference. Statistics are visualized for the different antigenic sites: **(a)** V1V2 apex, **(b)** gp120/gp41 interface, **(c)** CD4bs, **(d)** MPER, and **(e)** V3 glycan.

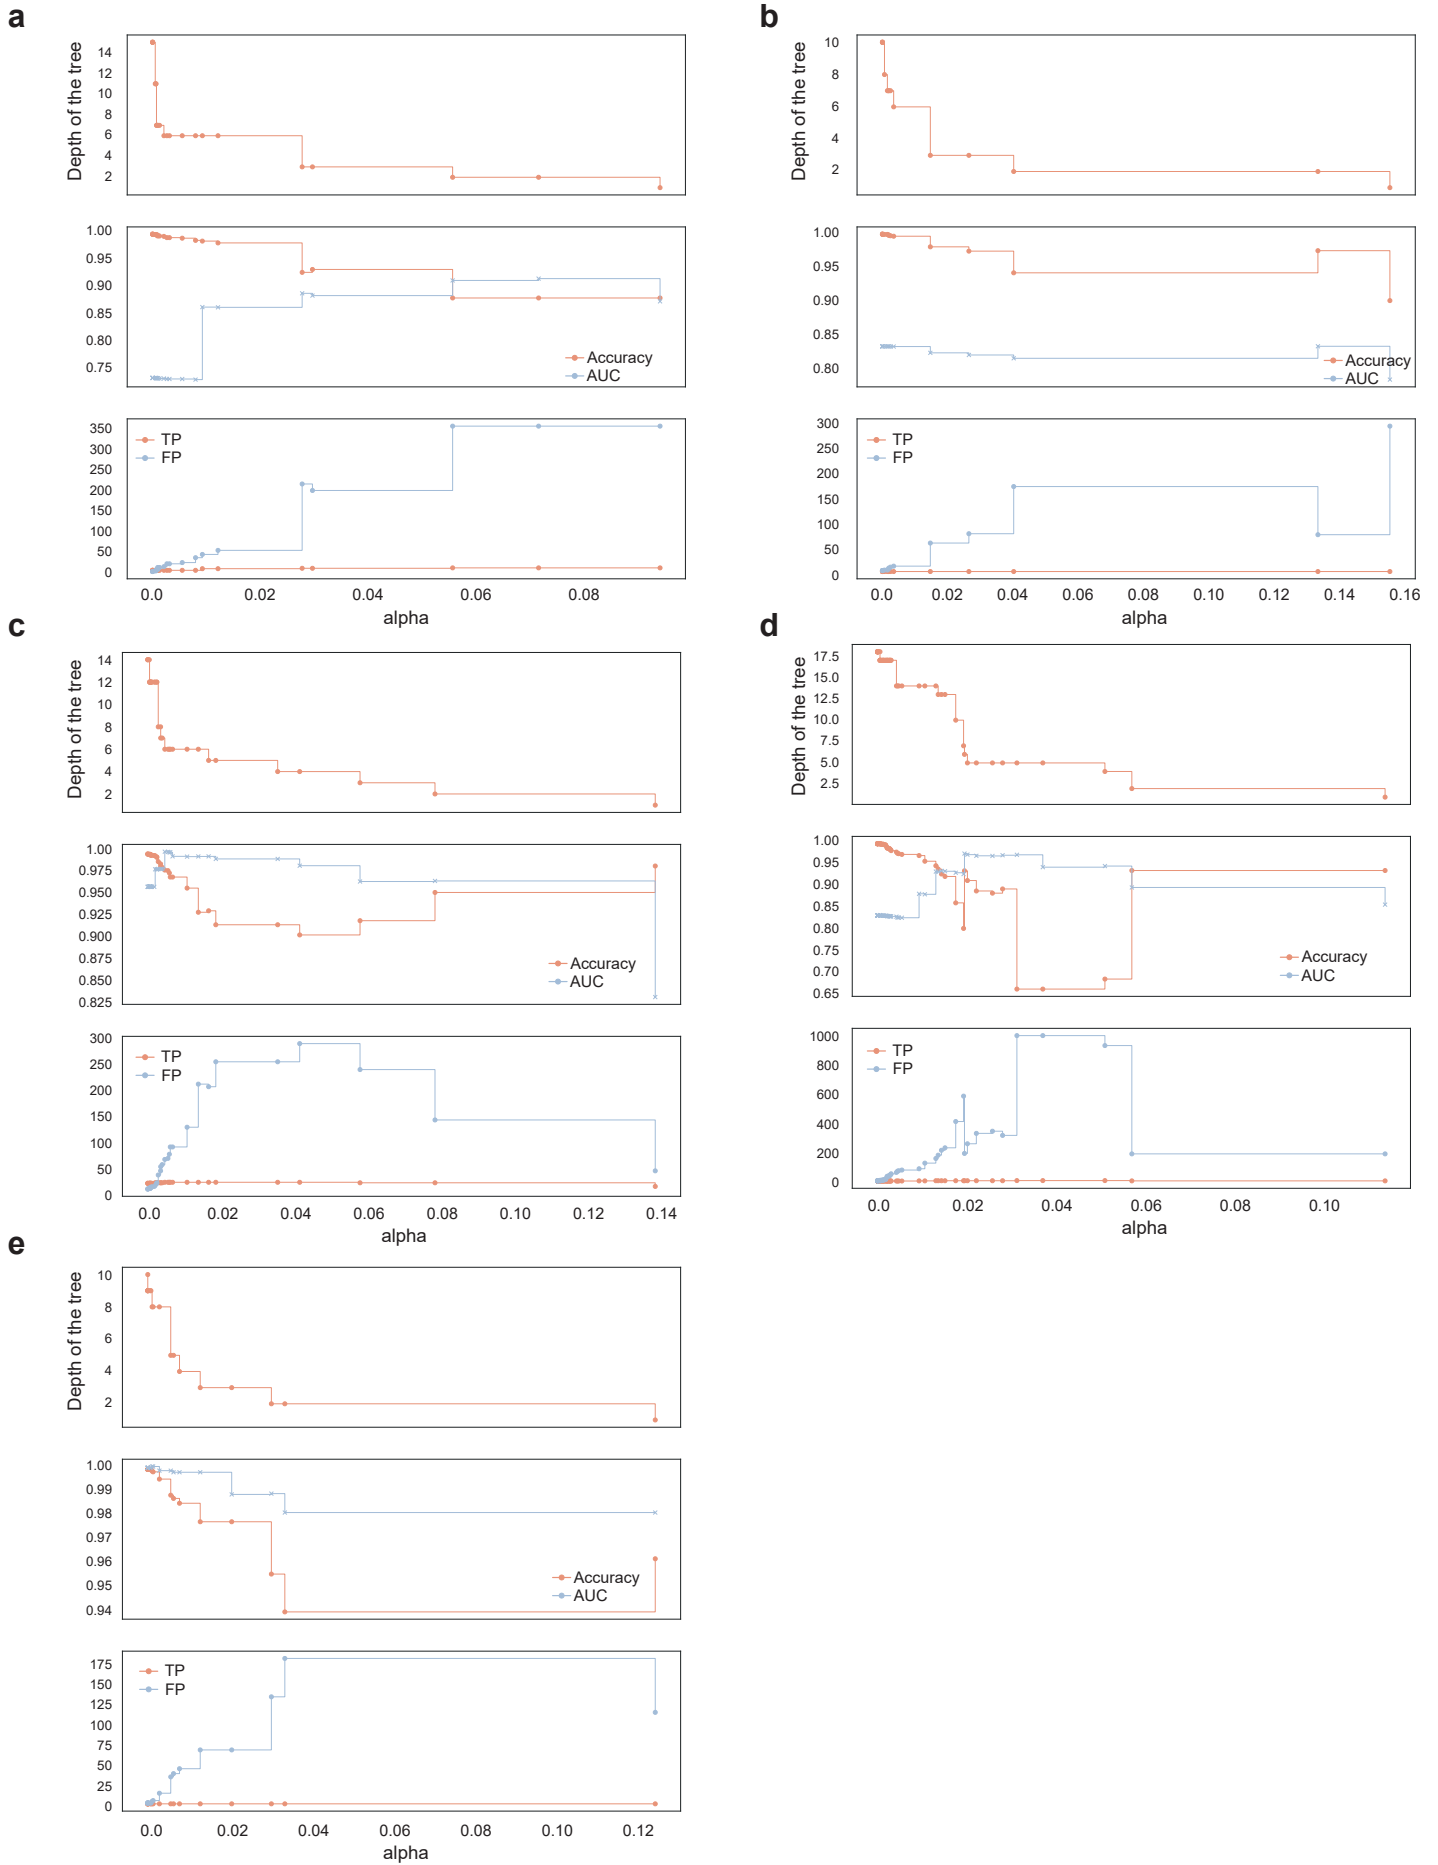

**Supplementary Figure 4. Determination of the cost complexity pruning parameter  $\alpha$  ( $ccp\_alpha$ ) for the Decision Tree classifier. Targeted antigenic sites are (a) CD4bs, (b) MPER, (c) V1V2 apex, (d) V3 glycan, and (e) gp120/gp41 interface.**

**a**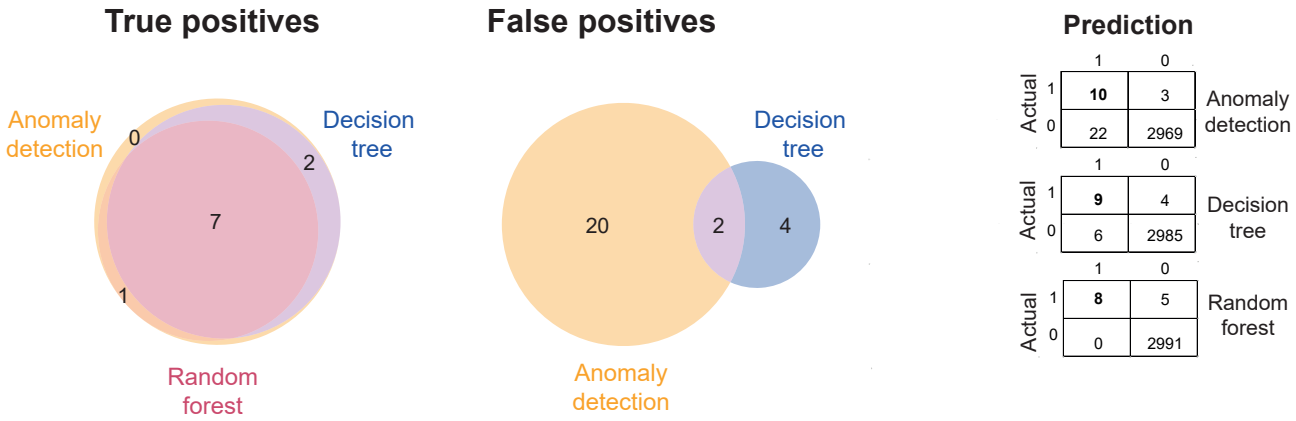**b**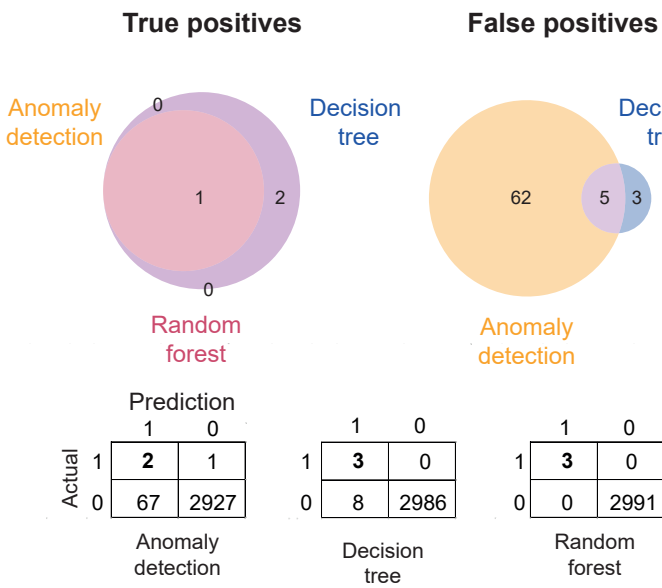**c**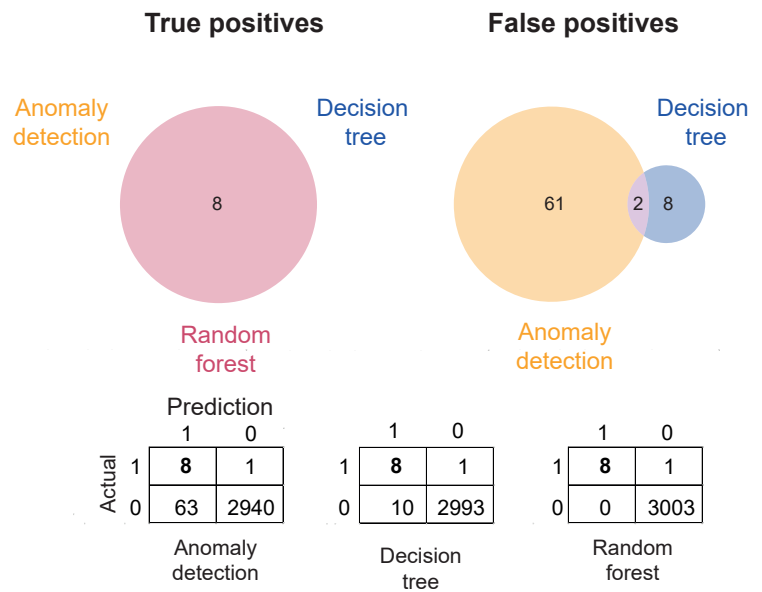**d**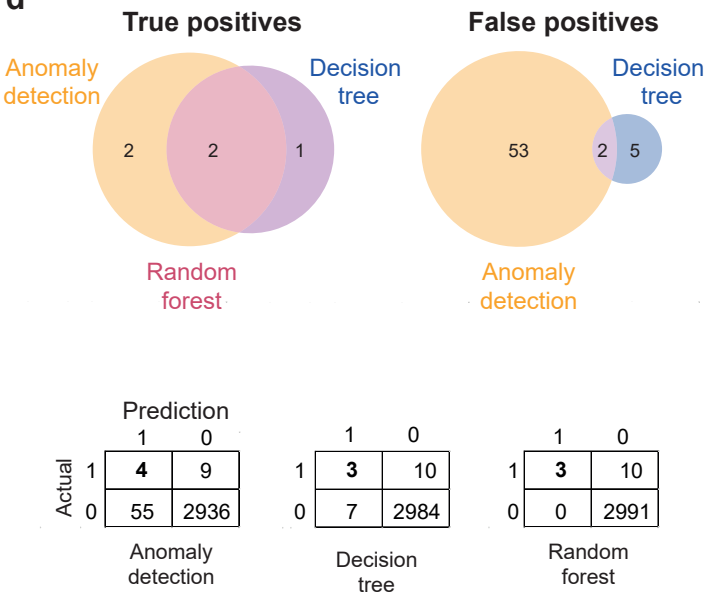**e**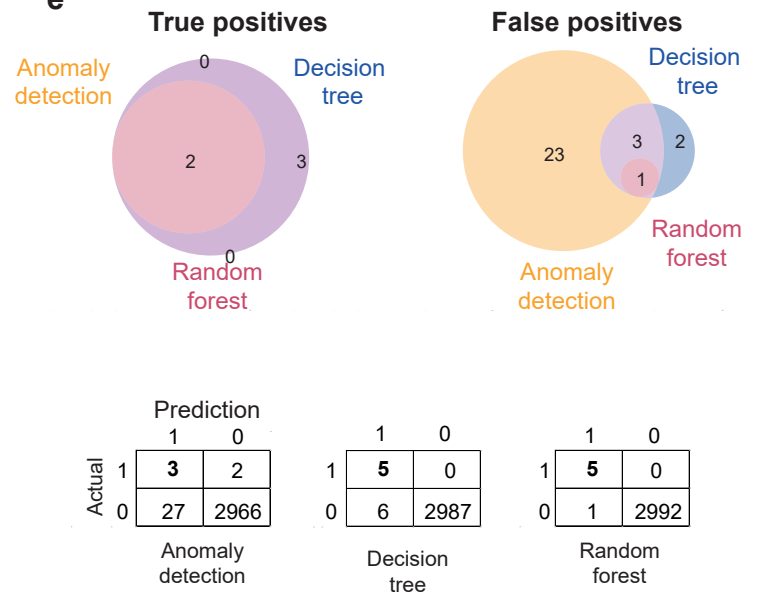

**Supplementary Figure 5. Overlap of false and true positives between the three different models using the test datasets.** Venn diagrams and Confusion matrices for each model are represented next to the Venn diagram. Antigenic sites are **(a)** CD4bs, **(b)** MPER, **(c)** V1V2 apex, **(d)** V3 glycan, and **(e)** gp120/gp41 interface. The yellow circle represents AD, the blue one is DT, and the red one is RF. Source data are provided as a Source Data file.

**a**

|                  | TP | FP | TN   | FN | AUC  | Accuracy | Recall | Precision |
|------------------|----|----|------|----|------|----------|--------|-----------|
| <b>CD4bs</b>     | 8  | 0  | 3739 | 7  | 0.77 | 1.00     | 0.53   | 1.00      |
| <b>MPER</b>      | 5  | 0  | 3740 | 1  | 0.92 | 1.00     | 0.83   | 1.00      |
| <b>V1V2</b>      | 11 | 0  | 3753 | 1  | 0.96 | 1.00     | 0.92   | 1.00      |
| <b>V3</b>        | 6  | 0  | 3738 | 11 | 0.68 | 1.00     | 0.35   | 1.00      |
| <b>Interface</b> | 7  | 0  | 3739 | 1  | 0.94 | 1.00     | 0.88   | 1.00      |

score  
1  
0.8  
0.6  
0.4  
0.2  
0

**b**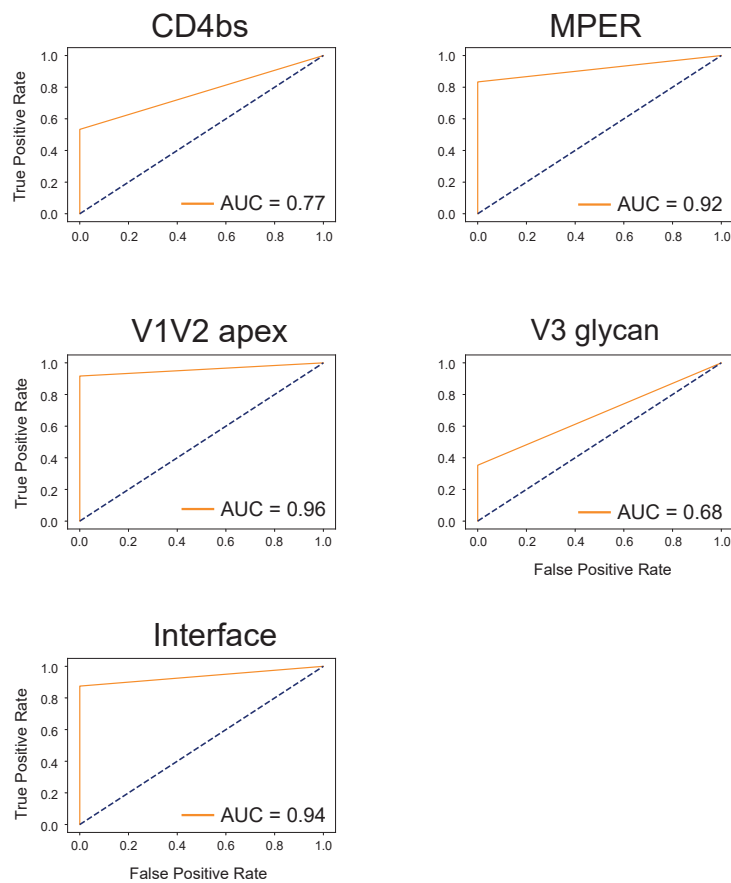**Supplementary Figure 6. Performance and results of the Super Learner Ensembles algorithm.**

**(a)** Performance metrics of the algorithm using the test dataset with Accuracy =  $(TP+TN) / (TP+FP+TN+FN)$ , Recall =  $TP / (TP+FN)$ , and Precision =  $TP / (TP+FP)$ . **(b)** Receiver-operating characteristic (ROC) curves and corresponding area under the curve (AUC) statistics for each bNAb antigenic site with the test dataset.



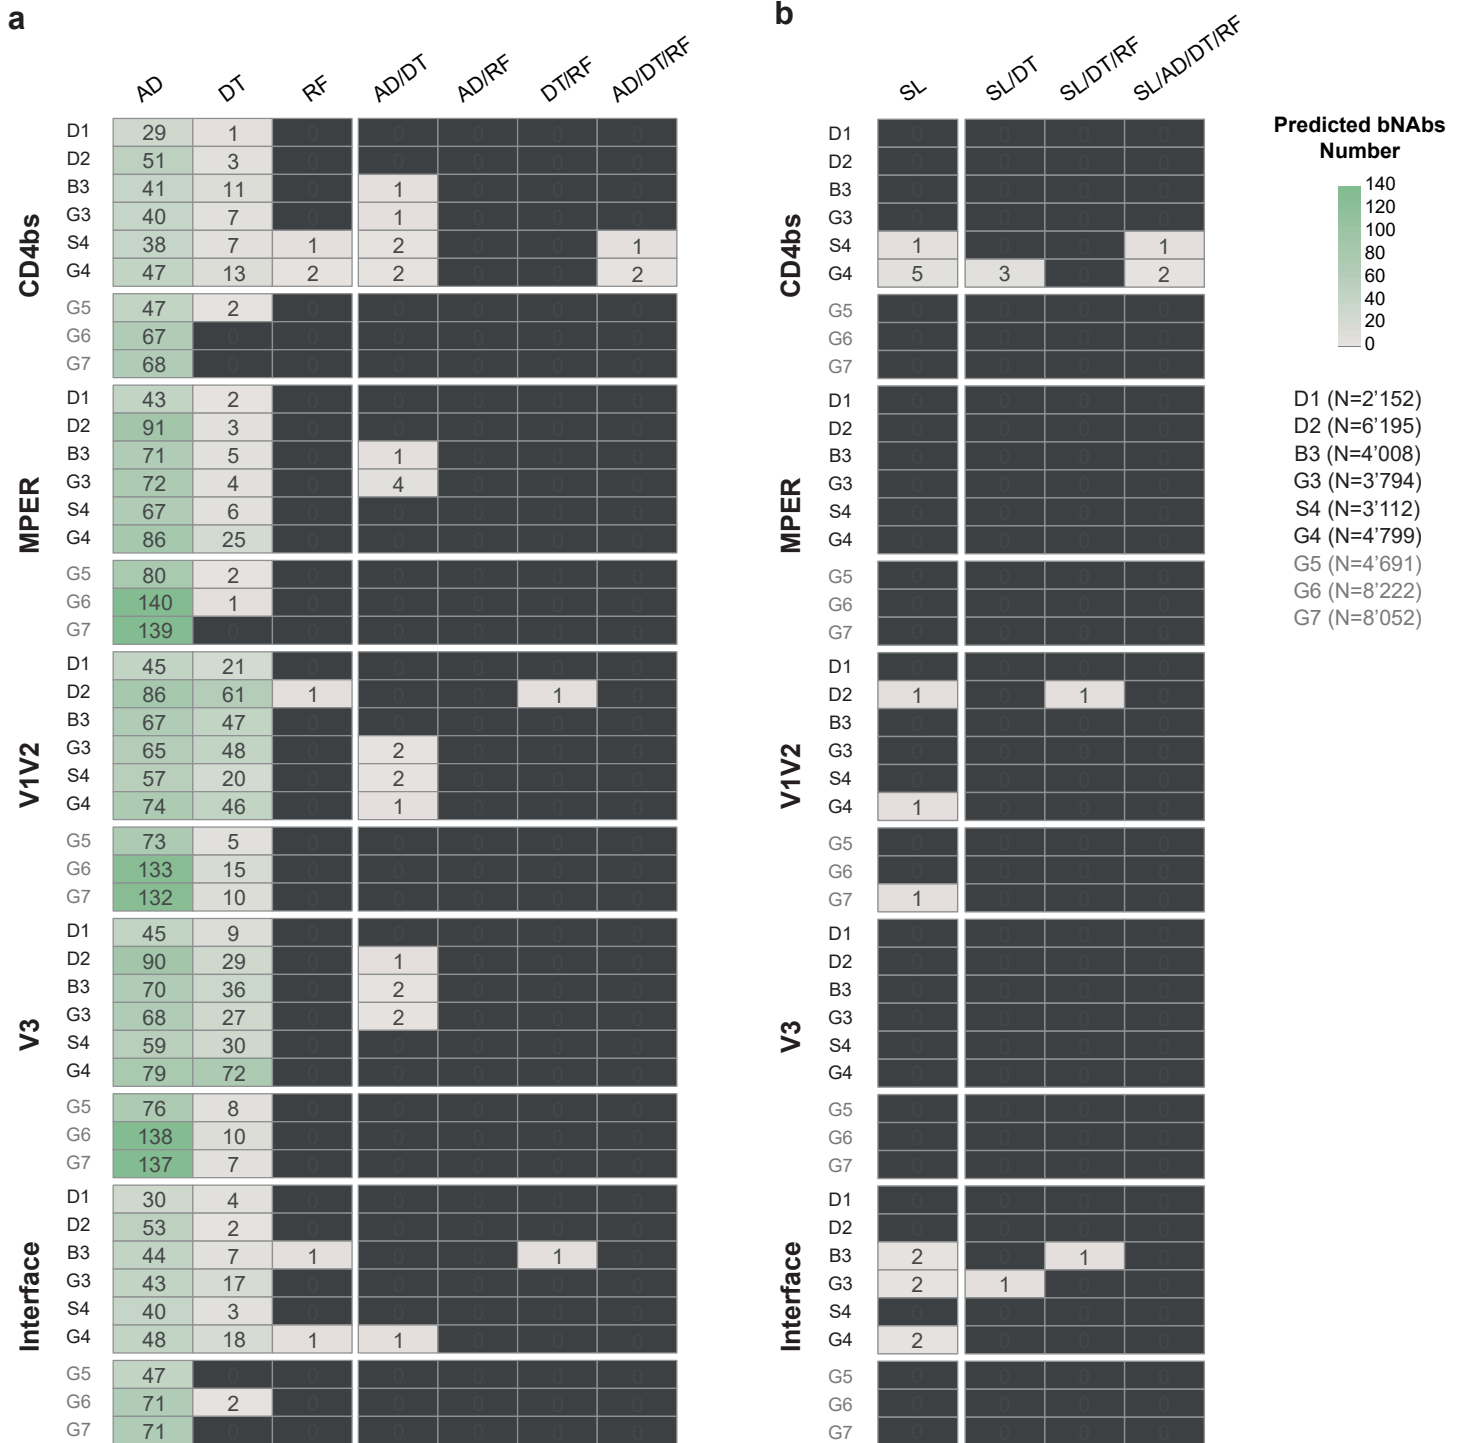

**Supplementary Figure 7. Predicted bNAb per dataset.** (a) The heatmap illustrates the number of predicted bNAb for each antigenic site and each run of donors using various algorithms, with D1: donor 1, D2: donor 2 (donor that did not have sera with broad neutralization activity) and B3, G3, S4, G4: donor 3 (donor serum with broad neutralization activity). The G5, G6, and G7 datasets correspond to a Influenza-specific repertoire. The columns on the right side of the heatmap show bNAb identified by different algorithms. The abbreviations used in each cell represent the combination of algorithms that share the specific bNAb (AD/DT: bNAb predicted only by both AD and DT, AD/RF: bNAb predicted only by both AD and RF, DT/RF: bNAb predicted only by both DT and RF and AD/DT/RF: bNAb predicted by all AD, DT and RF). (b) The heatmap illustrates the number of predicted bNAb for each antigenic site and each run of donors using the Super Learner (SL) algorithm. The columns on the right side of the heatmap show bNAb shared by different algorithms. The abbreviations used in each cell represent the combination of algorithms that share the specific bNAb (SL/DT: bNAb predicted only by both SL and DT, SL/DT/RF: bNAb predicted only by SL, DT and RF and SL/AD/DT/RF: bNAb predicted by all SL, AD, DT and RF).

**a**

|          |                                                                                                                              |     |      |     |      |     |      |     |    |    |    |     |    |    |    |    |    |    |     |     |     |    |    |    |     |      |      |      |      |      |      |     |     |     |
|----------|------------------------------------------------------------------------------------------------------------------------------|-----|------|-----|------|-----|------|-----|----|----|----|-----|----|----|----|----|----|----|-----|-----|-----|----|----|----|-----|------|------|------|------|------|------|-----|-----|-----|
|          |                                                                                                                              | FR1 | CDR1 | FR2 | CDR2 | FR3 | CDR3 | FR4 |    |    |    |     |    |    |    |    |    |    |     |     |     |    |    |    |     |      |      |      |      |      |      |     |     |     |
| UCA      | 1                                                                                                                            | 5   | 10   | 15  | 20   | 25  | 30   | 35  | 40 | 45 | 50 | 52A | 55 | 60 | 65 | 70 | 75 | 80 | 82A | 82B | 82C | 85 | 90 | 95 | 100 | 100A | 100B | 100C | 100D | 100E | 100F | 105 | 110 | 113 |
| UCA      | QVQLVQSGAEVKKPGASVKVSKASGYTFTGYMHWRQAPGQGLEWMGWINPNSGGTNYAQKFQGRVTMTRDTSISTAYMELSLRSLRSDDTAVYYCAXXXXXXXXXXXXXXXXXXWQGGLVTVSS |     |      |     |      |     |      |     |    |    |    |     |    |    |    |    |    |    |     |     |     |    |    |    |     |      |      |      |      |      |      |     |     |     |
| VRC01    | .....GQM.....E.MRI..R.....E.IDCTLN..I.L...KRP.....LK.RG.AV...RPL.....VYSD..FL..RS.TV.....F.TRGKNCDYNWDF--EH...R..P.I...      |     |      |     |      |     |      |     |    |    |    |     |    |    |    |    |    |    |     |     |     |    |    |    |     |      |      |      |      |      |      |     |     |     |
| bNAb4251 | ..HVM...DQ.....Q...TT..SS.IEDSL..IQ.V...EP..L..V..RH.AV..SW.IRD.I.....I.K..M.VQMRG.Q.....M...KSRRGANWA---L...W..RI....       |     |      |     |      |     |      |     |    |    |    |     |    |    |    |    |    |    |     |     |     |    |    |    |     |      |      |      |      |      |      |     |     |     |
| bNAb2101 | ..VM...DQ.RE.....R...T.ED.VES.L.....EP..LA.....RN.AV...-SLRD.L.L...IY...V.VDMRG.Q.....KARRGNTWAF---R...W..RI....             |     |      |     |      |     |      |     |    |    |    |     |    |    |    |    |    |    |     |     |     |    |    |    |     |      |      |      |      |      |      |     |     |     |
| bNAb1586 | .E.P...PSL.....T...RGDENL.IE..I..I.....H...MSILT.AP..SGN.RN.MS.Y..R.....D.RG.T.....V..TSRRRSGRGGTWFQ.....                    |     |      |     |      |     |      |     |    |    |    |     |    |    |    |    |    |    |     |     |     |    |    |    |     |      |      |      |      |      |      |     |     |     |

**b**

|          |                                                                                                              |     |      |     |      |     |      |     |    |    |    |    |    |    |    |    |    |    |    |    |     |     |     |
|----------|--------------------------------------------------------------------------------------------------------------|-----|------|-----|------|-----|------|-----|----|----|----|----|----|----|----|----|----|----|----|----|-----|-----|-----|
|          |                                                                                                              | FR1 | CDR1 | FR2 | CDR2 | FR3 | CDR3 | FR4 |    |    |    |    |    |    |    |    |    |    |    |    |     |     |     |
| UCA      | 1                                                                                                            | 5   | 10   | 15  | 20   | 25  | 30   | 35  | 40 | 45 | 50 | 55 | 60 | 65 | 70 | 75 | 80 | 85 | 90 | 95 | 100 | 105 | 107 |
| UCA      | DIQMTQSPSSLSASVGDRTITTCQASQDISNYLNWYQQKPKGAPKLLIYDASNLETGVPFRFSGSGSGTDFTFTTISLQPEDIAITYYCAQXX---XXFGGGTKVEIK |     |      |     |      |     |      |     |    |    |    |    |    |    |    |    |    |    |    |    |     |     |     |
| bNAb4251 | ...L...Y.A.....RE.N---D...L.R...P.....SG..K..R.....R..S...-SL...G.....G.....VF...EF.....R.D..                |     |      |     |      |     |      |     |    |    |    |    |    |    |    |    |    |    |    |    |     |     |     |
| bNAb2101 | .L.LD.....R..D---R.....P.....K.DR.....A...-L..NT.E.D.F.....VF...QF.....D..                                   |     |      |     |      |     |      |     |    |    |    |    |    |    |    |    |    |    |    |    |     |     |     |
| bNAb1586 | .T.V...P.....GT.....P..G.Q.Q.H.....R.....G.R..R.....R.SL..NN.....F.....AF...YS.....R....                     |     |      |     |      |     |      |     |    |    |    |    |    |    |    |    |    |    |    |    |     |     |     |

**c**

|       |                                                                                                              |     |      |     |      |     |      |     |    |    |    |    |    |    |    |    |    |    |    |    |     |     |     |
|-------|--------------------------------------------------------------------------------------------------------------|-----|------|-----|------|-----|------|-----|----|----|----|----|----|----|----|----|----|----|----|----|-----|-----|-----|
|       |                                                                                                              | FR1 | CDR1 | FR2 | CDR2 | FR3 | CDR3 | FR4 |    |    |    |    |    |    |    |    |    |    |    |    |     |     |     |
| UCA   | 1                                                                                                            | 5   | 10   | 15  | 20   | 25  | 30   | 35  | 40 | 45 | 50 | 55 | 60 | 65 | 70 | 75 | 80 | 85 | 90 | 95 | 100 | 105 | 107 |
| UCA   | EIVLTQSPATLSLSPGERATLSCRASQSVSSYLAWYQQKPGQAPRLLIYDASNRTATGIPARFSGSGSGTDFTLTISSLEPEDFAVYYCAQXX---XXFGGGTKVQVD |     |      |     |      |     |      |     |    |    |    |    |    |    |    |    |    |    |    |    |     |     |     |
| VRC01 | .....G.....T..I.I...T...-YGS.....R.....V..SG.T..A...D.....RW.P.YN...N..SG..G.....Y...EF.....                 |     |      |     |      |     |      |     |    |    |    |    |    |    |    |    |    |    |    |    |     |     |     |

**Supplementary Figure 8. bNAb alignment of VH and VK amino acid sequences.** Upper panel: (a) Alignment of the VH sequence of the three predicted bNAb with their UCA (unmutated common ancestor) and VRC01 bNAb. UCA is constituted of VH1-2\*02 and JH4\*02, the D gene is masked and represented by X. Residue positions are according to Kabat numbering. Dots indicate identical residues. (b) Middle panel: alignment of the VK sequences of the three predicted bNAb with their UCA (unmutated common ancestor). UCA is constituted of VK1-33\*01 and JK4\*01, the LCDR3 is masked and represented by X. (c) Lower panel: alignment of the VK sequence of the VRC01 with its UCA VK3-11\*01 and JK2\*01.

**a**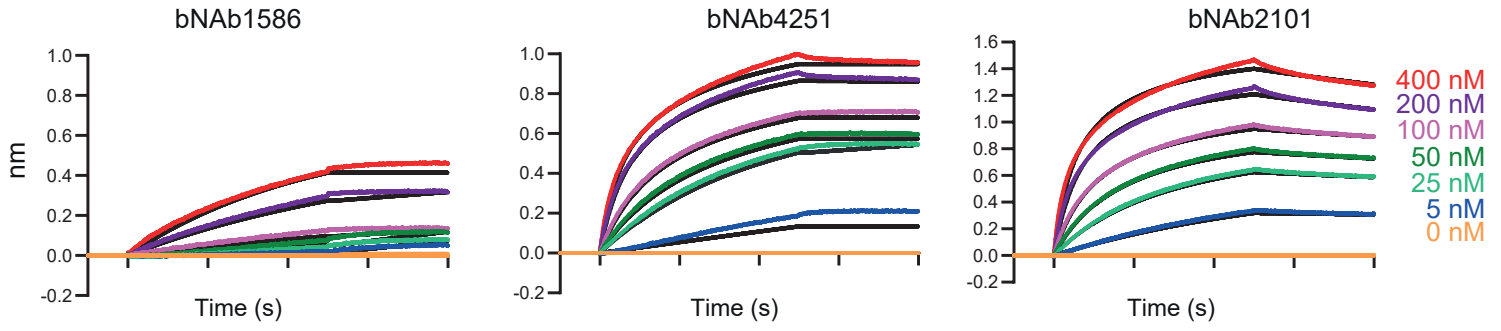**b**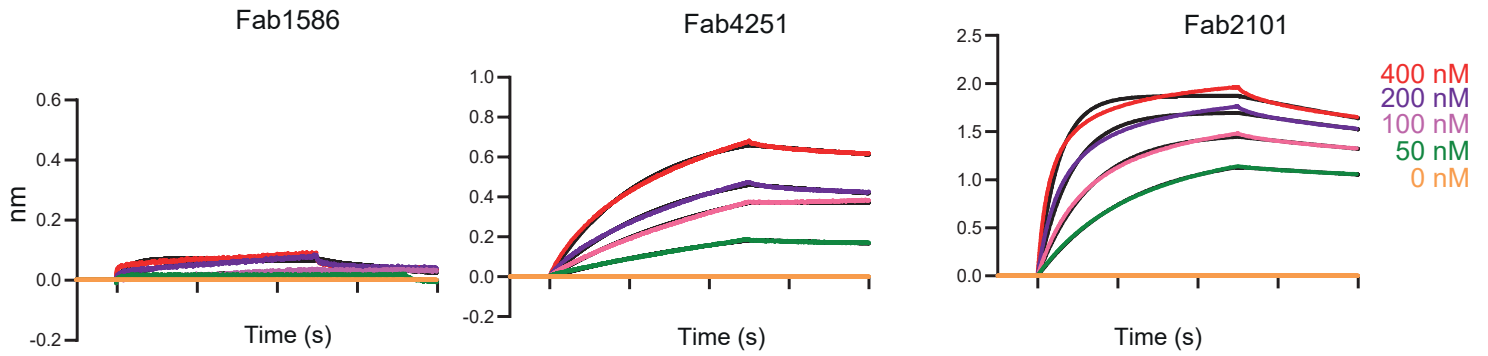**Supplementary Figure 9. Antibodies and Fabs interaction with BG505-DS-SOSIP.**

**(a)** Bivalent analyte fitting for antibody SOSIP interactions with concentrations ranging from 5 to 400 nM.

**(b)** Fitting of Fab interaction with BG505-DS-SOSIP using 1:1 model. For Fabs, concentrations ranging from 50 to 400 nM were used. Source data are provided as a Source Data file.

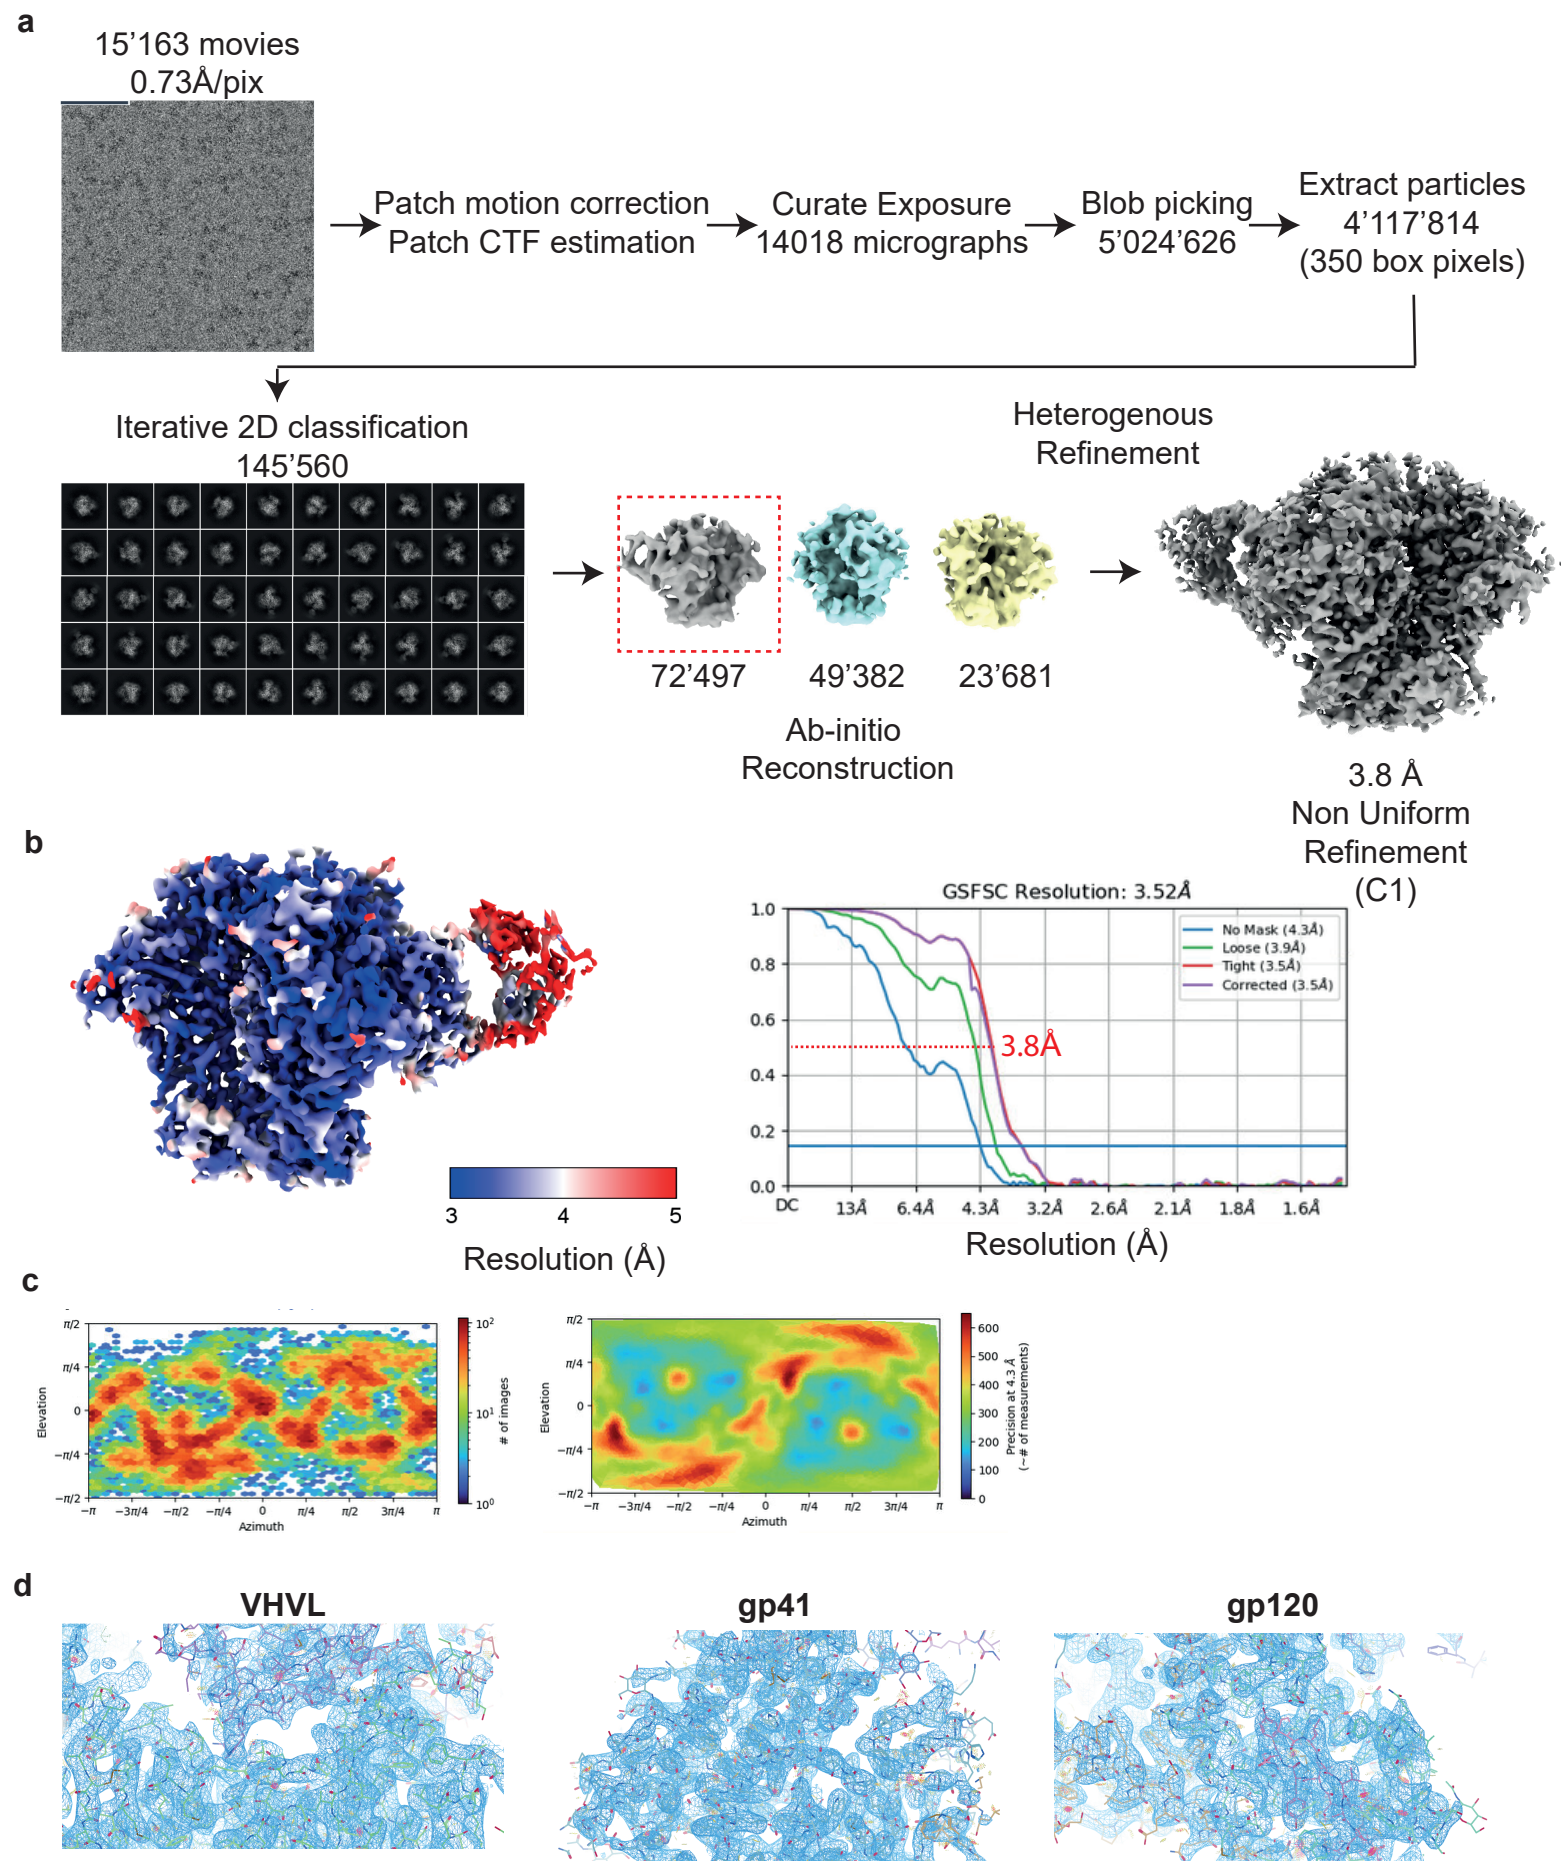

**Supplementary Figure 10. Cryo-EM data processing and validation of Fab-BG505-DS-SOSIP complexes.**

(a) Representative cryo-EM micrograph, 2D class average images and data processing flow chart.

(b) Local resolution of the final map and Gold standard Fourier shell correlation (FSC) at 0.143 resolution of 3.8 Å.

(c) Angular distribution of the Fab-BG505-DS-SOSIP particles in the final round of 3D refinement.

(d) Different density maps shown at threshold of  $6\sigma$  for VHVL, gp41 and gp120, respectively.

**Supplementary Table 1. Source of the ten datasets used as mAbs in the machine learning models and the three datasets used as Influenza repertoires.**

|            | <b>Paired BCRs<br/>(IGK/L+IGH)</b> | <b>Reference</b>                                                                                                                            |
|------------|------------------------------------|---------------------------------------------------------------------------------------------------------------------------------------------|
| <b>H1</b>  | 4 581                              | ArrayExpress: E-MTAB-11174 (Memory B cells of donor 1)                                                                                      |
| <b>H2</b>  | 4 740                              | ArrayExpress: E-MTAB-11174 (Memory B cells of donor 2)                                                                                      |
| <b>H3</b>  | 965                                | SRA: SRR17717616                                                                                                                            |
| <b>H4</b>  | 903                                | SRA: SRR17717597                                                                                                                            |
| <b>H5</b>  | 895                                | SRA: SRR17717612                                                                                                                            |
| <b>H6</b>  | 413                                | SRA: SRR17717605                                                                                                                            |
| <b>H7</b>  | 341                                | SRA: SRR17717601                                                                                                                            |
| <b>H8</b>  | 786                                | SRA: SRR17717593                                                                                                                            |
| <b>H9</b>  | 429                                | 10X dataset: 10k Human PBMCs, 5' v2.0, Chromium Controller, Single Cell Immune Profiling Dataset by Cell Ranger 6.1.0 (2021, August 9)      |
| <b>H10</b> | 909                                | 10X dataset: Human PBMC from a Healthy Donor, 10k cells (v2), Single Cell Immune Profiling Dataset by Cell Ranger 5.0.0 (2020, November 19) |
| <b>G5</b>  | 4 691                              | BioSample SAMN07733010, Day 9 after influenza vaccination.<br>SRA : SRR10596386, SRR10596375, SRR10596364,<br>SRR10596353                   |
| <b>G6</b>  | 8 222                              | BioSample SAMN07733010, Day 7 after influenza vaccination.<br>SRA : SRR10596411, SRR10596412, SRR10596410,<br>SRR10596409                   |
| <b>G7</b>  | 8 052                              | BioSample SAMN07733010, Day 7 after influenza vaccination.<br>SRA : SRR10596407, SRR10596406, SRR10596405,<br>SRR10596404                   |

**Supplementary Table 2. Performance metrics of the three algorithms using the validation dataset.**

| <b>Algo</b> | <b>Ag site</b> | <b>bNAbs Numbers</b> | <b>TP</b> | <b>FP</b> | <b>TN</b> | <b>FN</b> | <b>AUC</b> | <b>Accuracy</b> | <b>Recall</b> | <b>Precision</b> |
|-------------|----------------|----------------------|-----------|-----------|-----------|-----------|------------|-----------------|---------------|------------------|
| <b>AD</b>   | CD4bs          | 15                   | 12        | 22        | 2966      | 3         | 0.90       | 0.99            | 0.80          | 0.35             |
| <b>DT</b>   | CD4bs          | 15                   | 7         | 4         | 2984      | 8         | 0.73       | 1.00            | 0.47          | 0.64             |
| <b>RF</b>   | CD4bs          | 15                   | 7         | 0         | 2988      | 8         | 0.90       | 1.00            | 0.47          | 1.00             |
| <b>AD</b>   | MPER           | 3                    | 1         | 38        | 2956      | 2         | 0.66       | 0.99            | 0.33          | 0.03             |
| <b>DT</b>   | MPER           | 3                    | 2         | 4         | 2990      | 1         | 0.83       | 1.00            | 0.67          | 0.33             |
| <b>RF</b>   | MPER           | 3                    | 2         | 0         | 2994      | 1         | 0.83       | 1.00            | 0.67          | 1.00             |
| <b>AD</b>   | V1V2 apex      | 25                   | 19        | 55        | 2932      | 6         | 0.87       | 0.98            | 0.76          | 0.26             |
| <b>DT</b>   | V1V2 apex      | 25                   | 23        | 12        | 2975      | 2         | 0.96       | 1.00            | 0.92          | 0.66             |
| <b>RF</b>   | V1V2 apex      | 25                   | 19        | 0         | 2987      | 6         | 1.00       | 1.00            | 0.76          | 1.00             |
| <b>AD</b>   | V3 glycan      | 9                    | 5         | 57        | 2938      | 4         | 0.77       | 0.98            | 0.56          | 0.08             |
| <b>DT</b>   | V3 glycan      | 9                    | 6         | 8         | 2987      | 3         | 0.83       | 1.00            | 0.67          | 0.43             |
| <b>RF</b>   | V3 glycan      | 9                    | 2         | 0         | 2995      | 7         | 1.00       | 1.00            | 0.22          | 1.00             |
| <b>AD</b>   | Interface      | 3                    | 1         | 31        | 2964      | 2         | 0.66       | 0.99            | 0.33          | 0.03             |
| <b>DT</b>   | Interface      | 3                    | 3         | 4         | 2991      | 0         | 1.00       | 1.00            | 1.00          | 0.43             |
| <b>RF</b>   | Interface      | 3                    | 2         | 0         | 2995      | 1         | 1.00       | 1.00            | 0.67          | 1.00             |

### Supplementary Table 3. Cryo-EM data collection, refinement, and validation statistics.

Data Accession PDB ID: 8S2E EMDB: EMD-19665

---

|                                                  |                          |
|--------------------------------------------------|--------------------------|
| Magnification                                    | 165'000                  |
| Voltage (kV)                                     | 300                      |
| Electron exposure (e-/Å <sup>2</sup> )           | 39.89                    |
| Defocus range (μm)                               | -0.9 to -2.4             |
| Pixel size (Å)                                   | 0.73277                  |
| Symmetry imposed                                 | C1                       |
| Micrographs collected (no.)                      | 15,163                   |
| Final particle images (no.)                      | 72497                    |
| Map resolution (Å)                               | 3.8                      |
| FSC threshold                                    | 0.143                    |
| Map resolution range (Å)                         |                          |
| <b>Refinement</b>                                |                          |
| Initial model used (PDB code)                    | 4TVP                     |
| Model resolution (Å)                             | 3.8                      |
| FSC threshold                                    | 0.143                    |
| Map sharpening <i>B</i> factor (Å <sup>2</sup> ) |                          |
| Model composition                                |                          |
| Non-hydrogen atoms                               | 16305                    |
| Protein residues                                 | 1958                     |
| Ligands                                          | BMA:6<br>NAG:73<br>MAN:6 |
| <i>B</i> factors (Å <sup>2</sup> )               |                          |
| Protein                                          | 100.6                    |
| R.m.s. deviations                                |                          |
| Bond lengths (Å)                                 | 0                        |
| Bond angles (°)                                  | 0.75                     |
| Validation                                       |                          |
| MolProbity score                                 | 2.10                     |
| Clashscore                                       | 9.0                      |
| Poor rotamers (%)                                | 2.3                      |
| Ramachandran plot                                |                          |
| Favored (%)                                      | 95.5                     |
| Allowed (%)                                      | 4.5                      |
| Disallowed (%)                                   | 0.0                      |

---
